# Supplementary material
Source: HighWire-hosted journal article supplement (https://www.jneurosci.org/highwire/filestream/600120/field_highwire_adjunct_files/2/Supplemental_Legend.pdf)
Supplement: Supplemental_Legend.pdf [file Supplemental_Legend.pdf]

**Supplemental Movies:** BV-2 cells were plated on culture plates at a density of  $6 \times 10^5$  cells/well. On the day of imaging the media was replaced with fresh serum free DMEM. Live cell imaging was performed on the Zeiss LSM 510 confocal microscope using a heated stage. Both Cy3- A $\beta$  (2 $\mu$ g/mL) and LysoTracker (Molecular Probes, Green DND-26) were added to the culture media simultaneously at the time of imaging. Frames were taken every 45 sec for 20 min. Uptake of Cy3-sA $\beta$  can be seen in supplemental movie 1. Colocalization of sA $\beta$  into LysoTracker vesicles can be seen in supplemental movie 2.
